# Supplementary material for: Effect of synchronous remote-based interventions on suicidal behaviours: protocol for a systematic review and meta-analysis
Source: PubMed Central journal article supplement — BMJ Open. 2023 Dec 6;13(12):e075116. doi: 10.1136/bmjopen-2023-075116 (PMC10711844; doi:10.1136/bmjopen-2023-075116), 2023-12-06
Supplement: bmjopen-2023-075116supp002.pdf [file bmjopen-2023-075116supp002.pdf]

**Supplementary File 2. PubMed search strategy****Search strategy**

("suicide"[MeSH Terms] OR suicid\*[Title] OR "suicidal ideation"[MeSH Terms] OR "suicide ideation"[Title] OR "suicide, attempted"[MeSH Terms] OR "attempted suicide"[Title] OR "suicidal behavio\*" [Title] OR "non-fatal attempt"[Title] OR "unsuccessful attempt"[Title] OR "suicide, completed"[MeSH Terms] OR "completed suicide"[Title] OR "fatal attempt"[Title] OR "self-injurious behavior"[MeSH Terms] OR self-injur\*[Title] OR self-harm\*[Title] OR "self-destructive behavio\*" [Title] OR self-poisoning[Title] OR "repeated suicide"[Title] OR suicide-risk[Title])

AND ("treatment outcome"[MeSH Terms] OR treatment[Title/Abstract] OR therap\*[Title/Abstract] OR intervention\*[Title/Abstract] OR "crisis intervention"[MeSH Terms] OR prevention[Title/Abstract] OR "follow-up studies"[MeSH Terms] OR follow-up[Title/Abstract] OR contact\*[Title/Abstract] OR management[Title/Abstract] OR program\*[Title/Abstract] OR "psychotherapy, brief"[MeSH Terms] OR "brief psychotherap\*" [Title/Abstract] OR "brief contact intervention\*" [Title/Abstract] OR "post-discharge intervention\*" [Title/Abstract] OR effectiv\*[Title/Abstract] OR efficacy[Title/Abstract])

AND (synchron\*[Title/Abstract] OR "online systems"[MeSH Terms] OR real-time[Title/Abstract] OR "immediate communication\*" [Title/Abstract] OR "remote consultation"[MeSH Terms] OR remote\*[Title/Abstract] OR non-presential[Title/Abstract] OR non-face-to-face[Title/Abstract] OR non-attend\*[Title/Abstract] OR "distance counseling"[MeSH Terms] OR distance[Title/Abstract] OR digital[Title/Abstract] OR "telemedicine"[MeSH Terms] OR telemedicine[Title/Abstract] OR "telecommunications"[MeSH Terms] OR "telecommunication\*" [Title/Abstract] OR telehealth[Title/Abstract] OR teleassistance[Title/Abstract] OR telepsychology[Title/Abstract] OR telepsychiatry[Title/Abstract] OR telecare[Title/Abstract] OR telemonitoring[Title/Abstract] OR teleconsult\*[Title/Abstract] OR telecounsel\*[Title/Abstract] OR "telemental health"[Title/Abstract] OR online[Title/Abstract] OR on-line[Title/Abstract] OR "information and communication technolog\*" [Title/Abstract] OR ICT[Title/Abstract] OR e-therap\*[Title/Abstract] OR "electronic therap\*" [Title/Abstract] OR e-health[Title/Abstract] OR "electronic health"[Title/Abstract] OR m-health[Title/Abstract] OR "mobile health"[Title/Abstract] OR "telephone"[MeSH Terms] OR telephon\*[Title/Abstract] OR "cell phone"[MeSH Terms] OR phone\*[Title/Abstract] OR "phone call\*" [Title/Abstract] OR call\*[Title/Abstract] OR "telephone contact\*" [Title/Abstract] OR "hotlines"[MeSH Terms] OR hotline\*[Title/Abstract] OR "hot line service\*" [Title/Abstract] OR "call centers"[MeSH Terms] OR helpline\*[Title/Abstract] OR lifeline\*[Title/Abstract] OR "suicide prevention lifeline"[Title/Abstract] OR "crisis line\*" [Title/Abstract] OR video\*[Title/Abstract] OR "videoconferencing"[MeSH Terms] OR video-call\*[Title/Abstract] OR "clinical videoconferencing"[Title/Abstract] OR CVT[Title/Abstract] OR chat\*[Title/Abstract] OR chatbot[Title/Abstract] OR "text messaging"[MeSH Terms] OR "text messaging"[Title/Abstract] OR "instant messag\*" [Title/Abstract] OR SMS[Title/Abstract] OR "mobile applications"[MeSH Terms] OR "mobile application\*" [Title/Abstract] OR App[Title/Abstract] OR "phone application\*" [Title/Abstract])

AND ("randomized controlled trials as Topic"[Mesh] OR "randomized controlled trial"[Title/Abstract] OR "controlled clinical trials as Topic"[Mesh] OR "controlled clinical trial"[Title/Abstract] OR trial\*[Title/Abstract] OR "clinical studies as Topic"[MeSH Terms] OR

"clinical stud\*"[Title/Abstract] OR "random allocation"[MeSH Terms] OR random\*[Title/Abstract] OR "intervention group\*"[Title/Abstract] OR "control group\*"[Title/Abstract])

NOT (systematic review\*[Title] OR review\*[Title] OR meta\*[Title] OR protocol[Title])

### **Filters**

The following filters were applied: text availability (Full text), language (English, Spanish), age (Adolescent: 13-18 years, Adult: 19+ years).
